# Supplementary material for: Effect of trifluridine/tipiracil in patients treated in RECOURSE by prognostic factors at baseline: an exploratory analysis
Source: PubMed Central journal article supplement — ESMO Open. 2020 Aug 19;5(4):e000752. doi: 10.1136/esmoopen-2020-000752 (PMC7440836; doi:10.1136/esmoopen-2020-000752), 2020-08-19

**THE EFFECT OF TRIFLURIDINE/TIPIRACIL IN PATIENTS TREATED IN RECOURSE BY PROGNOSTIC FACTORS AT BASELINE: AN EXPLORATORY ANALYSIS**

**Authors:** Josep Tabernero, Guillem Argilés, Alberto Sobrero, Christophe Borg, Atsushi Ohtsu, Robert J. Mayer, Loick Vidot, Shanti R. Moreno Vera, Eric Van Cutsem

**Supplementary material**

**Table S1** Treatment duration and dose delays/reductions

|                                         | GPC subgroup    |                 | PPC subgroup    |                 |
|-----------------------------------------|-----------------|-----------------|-----------------|-----------------|
|                                         | FTD/TPI (n=261) | Placebo (n=125) | FTD/TPI (n=272) | Placebo (n=140) |
| <b>No. of cycles</b>                    |                 |                 |                 |                 |
| Mean (SD)                               | 4.1 (2.9)       | 2.5 (1.8)       | 2.8 (2.0)       | 2.1 (1.1)       |
| Median (range)                          | 3 (1–18)        | 2 (1–16)        | 2 (1–11)        | 2 (1–8)         |
| <b>Treatment duration, weeks</b>        |                 |                 |                 |                 |
| Mean (SD)                               | 18.3 (13.9)     | 10.2 (7.5)      | 12.2 (8.7)      | 8.5 (4.3)       |
| Median (range)                          | 13 (4–80)       | 8.1 (4–66)      | 8.4 (4–49)      | 8.1 (4–32)      |
| <b>Delays or dose reductions, n (%)</b> |                 |                 |                 |                 |
| Delay in $\geq 1$ cycle <sup>a</sup>    | 140 (53.6)      | 7 (5.6)         | 105 (38.6)      | 7 (5.0)         |
| $\geq 1$ dose reduction                 | 47 (18.0)       | 0               | 26 (9.6)        | 3 (2.1)         |

FTD/TPI, trifluridine/tipiracil; GPC, good prognostic characteristics; PPC, poor prognostic characteristics; SD, standard deviation.

GPC was defined as <3 metastatic sites and  $\geq 18$  months since first metastasis.

<sup>a</sup>A delay of  $\geq 4$  days in initiation of  $\geq 1$  cycle.

**Table S2** The effect of various prognostic factors on OS at 6 and 12 months

|                          | 6 month OS<br>FTD/TPI/Placebo | 12 month OS<br>FTD/TPI/Placebo | 6 month OS<br>FTD/TPI/Placebo | 12 month OS<br>FTD/TPI/Placebo |
|--------------------------|-------------------------------|--------------------------------|-------------------------------|--------------------------------|
| ITT RECURSE              |                               |                                |                               |                                |
| Overall                  | 57.8% / 43.5%                 | 26.6% / 17.6%                  |                               |                                |
| GPC subgroup             | 71.7% / 53.9%                 | 37.5% / 25.2%                  |                               |                                |
| PPC subgroup             | 44.4% / 34.1%                 | 15.3% / 10.7%                  |                               |                                |
| No liver metastases      |                               |                                | Liver metastases              |                                |
| GPC subgroup             | 83.4% / 71.0%                 | 65.1% / 34.8%                  | 64.8% / 40.1%                 | 22.1% / 17.3%                  |
| PPC subgroup             | 62.7% / 52.4%                 | 36.1% / 22.2%                  | 41.7% / 31.0%                 | 12.4% / 8.7%                   |
| No lung metastases       |                               |                                | Lung metastases               |                                |
| GPC subgroup             | 73.8% / 60.0%                 | 30.8% / 19.5%                  | 70.6% / 52.3%                 | 41.2% / 27.0%                  |
| PPC subgroup             | 38.5% / 37.5%                 | 11.9% / 16.7%                  | 46.0% / 33.5%                 | 16.2% / 9.8%                   |
| No lymph metastases      |                               |                                | Lymph metastases              |                                |
| GPC subgroup             | 71.3% / 53.3%                 | 36.4% / 27.8%                  | 73.6% / 55.8%                 | 41.5% / 19.1%                  |
| PPC subgroup             | 40.8% / 32.0%                 | 16.8% / 7.7%                   | 47.2% / 35.3%                 | 14.7% / 12.3%                  |
| No peritoneal metastases |                               |                                | Peritoneal metastases         |                                |
| GPC subgroup             | 70.3% / 54.1%                 | 35.6% / 26.1%                  | 89.5% / 50.0%                 | 59.8% / 0.0%                   |
| PPC subgroup             | 44.1% / 35.0%                 | 16.0% / 10.5%                  | 45.4% / 31.7%                 | 13.6% / 11.3%                  |
| ECOG PS = 0              |                               |                                | ECOG PS = 1                   |                                |
| GPC subgroup             | 76.4% / 59.4%                 | 41.3% / 30.4%                  | 64.7% / 45.0%                 | 31.5% / 16.2%                  |
| PPC subgroup             | 56.1% / 40.2%                 | 20.1% / 17.0%                  | 31.7% / 28.2%                 | 10.1% / 5.5%                   |
| Age <65 years            |                               |                                | Age ≥65 years                 |                                |
| GPC subgroup             | 72.6% / 54.8%                 | 38.8% / 26.8%                  | 70.7% / 52.6%                 | 36.2% / 23.2%                  |
| PPC subgroup             | 44.3% / 36.7%                 | 14.0% / 9.8%                   | 44.9% / 31.1%                 | 16.6% / 11.5%                  |
| KRAS wild type           |                               |                                | KRAS mutant                   |                                |
| GPC subgroup             | 71.7% / 53.5%                 | 33.0% / 19.5%                  | 71.9% / 54.4%                 | 43.1% / 29.7%                  |
| PPC subgroup             | 51.9% / 37.6%                 | 18.5% / 10.7%                  | 38.6% / 30.8%                 | 12.9% / 11.8%                  |

ECOG PS, Eastern Cooperative Oncology Group performance status; FTD/TPI, trifluridine/tipiracil; GPC, good prognostic characteristics; ITT, intent to treat; OS, overall survival; PPC, poor prognostic characteristics.

GPC was defined as <3 metastatic sites and ≥18 months since first metastasis.

**Table S3** The effect of various prognostic factors on PFS at 3, 6 and 9 months

|                          | 3 month PFS<br>FTD/TPI/Placebo | 6 month PFS<br>FTD/TPI/Placebo | 9 month PFS<br>FTD/TPI/Placebo | 3 month PFS<br>FTD/TPI/Placebo | 6 month PFS FTD/TPI<br>/Placebo | 9 month PFS FTD-TPI<br>/Placebo |
|--------------------------|--------------------------------|--------------------------------|--------------------------------|--------------------------------|---------------------------------|---------------------------------|
| ITT RECOURSE             |                                |                                |                                |                                |                                 |                                 |
| Overall                  | 40.9% / 13.0%                  | 15.1% / 1.4%                   | 7.7% / 1.4%                    |                                |                                 |                                 |
| GPC subgroup             | 51.1% / 14.5%                  | 22.4% / 1.9%                   | 12.1% / 1.9%                   |                                |                                 |                                 |
| PPC subgroup             | 31.0% / 11.6%                  | 7.9% / 0.9%                    | 3.3% / NE                      |                                |                                 |                                 |
| No liver metastases      |                                |                                |                                | Liver metastases               |                                 |                                 |
| GPC subgroup             | 66.9% / 26.2%                  | 35.9% / 4.3%                   | 20.7% / 4.3%                   | 41.9% / 4.7%                   | 14.5% / 0.0%                    | 7.1% / 0.0%                     |
| PPC subgroup             | 37.6% / 30.6%                  | 17.6% / 0.0%                   | 6.6% / 0.0%                    | 30.1% / 8.2%                   | 6.6% / 1.1%                     | 2.8% / NE                       |
| No lung metastases       |                                |                                |                                | Lung metastases                |                                 |                                 |
| GPC subgroup             | 47.5% / 20.0%                  | 18.4% / 4.0%                   | 11.9% / 4.0%                   | 53.0% / 13.1%                  | 24.5% / 1.3%                    | 12.3% / 1.3%                    |
| PPC subgroup             | 20.4% / 13.0%                  | 4.7% / 0.0%                    | 2.3% / 0.0%                    | 33.6% / 11.3%                  | 8.8% / 0.9%                     | 3.5% / NE                       |
| No lymph metastases      |                                |                                |                                | Lymph metastases               |                                 |                                 |
| GPC subgroup             | 49.9% / 13.6%                  | 21.3% / 1.4%                   | 12.8% / 1.4%                   | 55.9% / 17.4%                  | 26.6% / 3.5%                    | 9.2% / 3.5%                     |
| PPC subgroup             | 34.9% / 7.7%                   | 9.0% / 0.0%                    | 2.3% / 0.0%                    | 28.0% / 14.2%                  | 7.3% / 1.3%                     | 4.4% / NE                       |
| No peritoneal metastases |                                |                                |                                | Peritoneal metastases          |                                 |                                 |
| GPC subgroup             | 49.5% / 15.3%                  | 21.7% / 2.0%                   | 11.7% / 2.0%                   | 73.0% / 0.0%                   | 32.7% / 0.0%                    | 17.5% / 0.0%                    |
| PPC subgroup             | 32.6% / 12.2%                  | 8.8% / 0.0%                    | 3.4% / 0.0%                    | 26.5% / 10.3%                  | 5.9% / 2.6%                     | 2.9% / NE                       |
| ECOG PS = 0              |                                |                                |                                | ECOG PS = 1                    |                                 |                                 |
| GPC subgroup             | 53.7% / 13.7%                  | 22.2% / 2.7%                   | 12.2% / 2.7%                   | 47.2% / 15.7%                  | 22.7% / 0.0%                    | 11.9% / 0.0%                    |
| PPC subgroup             | 35.8% / 16.4%                  | 9.6% / 0.0%                    | 4.7% / 0.0%                    | 25.8% / 7.2%                   | 6.2% / 1.4%                     | 1.7% / NE                       |
| Age <65 years            |                                |                                |                                | Age ≥65 years                  |                                 |                                 |
| GPC subgroup             | 50.1% / 16.3%                  | 18.6% / 1.8%                   | 7.0% / 1.8%                    | 52.2% / 12.1%                  | 26.9% / 2.0%                    | 18.3% / 2.0%                    |
| PPC subgroup             | 26.1% / 13.6%                  | 7.1% / 2.0%                    | 2.1% / NE                      | 38.1% / 9.6%                   | 9.1% / 0.0%                     | 4.6% / 0.0%                     |
| KRAS wild type           |                                |                                |                                | KRAS mutant                    |                                 |                                 |
| GPC subgroup             | 51.1% / 16.8%                  | 20.3% / 1.9%                   | 13.4% / 1.9%                   | 51.2% / 12.5%                  | 25.1% / 2.1%                    | 10.5% / 2.1%                    |
| PPC subgroup             | 33.3% / 16.5%                  | 8.8% / 2.5%                    | 2.9% / NE                      | 29.2% / 7.3%                   | 7.2% / 0.0%                     | 3.9% / 0.0%                     |

ECOG PS, Eastern Cooperative Oncology Group performance status; FTD/TPI, trifluridine/tipiracil; GPC, good prognostic characteristics; ITT, intent to treat; NE, not evaluable; PFS, progression-free survival.

GPC was defined as <3 metastatic sites and ≥18 months since first metastasis.

**Table S4** Baseline patient demographics and clinical characteristics in RECURSE patients in the GPC subgroup (number of metastatic sites <3 and time since 1st metastasis ≥18 months) with no liver metastasis at randomisation (n=153).

|                                           | Trifluridine/tipiracil  |                                        | Placebo                 |                                        |
|-------------------------------------------|-------------------------|----------------------------------------|-------------------------|----------------------------------------|
|                                           | GPC subgroup<br>(n=261) | GPC no liver<br>met subgroup<br>(n=97) | GPC subgroup<br>(n=125) | GPC no liver<br>met subgroup<br>(n=56) |
| Median age, years                         | 64.0                    | 64.0                                   | 63.0                    | 61.0                                   |
| Patient age, n (%)                        |                         |                                        |                         |                                        |
| <65 years                                 | 137 (52.5)              | 52(53.6)                               | 72 (57.6)               | 36(64.3)                               |
| 65 to <75 years                           | 105 (40.2)              | 37(38.1)                               | 43 (34.4)               | 16(28.6)                               |
| ≥75 years                                 | 19 (7.3)                | 8(8.2)                                 | 10 (8.0)                | 4(7.1)                                 |
| Gender, n (%)                             |                         |                                        |                         |                                        |
| Females                                   | 97 (37.2)               | 38(39.2)                               | 47 (37.6)               | 22(39.3)                               |
| Male                                      | 164 (62.8)              | 59(60.8)                               | 78 (62.4)               | 34(60.7)                               |
| Race, n (%)                               |                         |                                        |                         |                                        |
| Asian                                     | 91 (34.9)               | 35(36.1)                               | 43 (34.4)               | 26(46.4)                               |
| Other                                     | 170 (65.1)              | 62 (63.9)                              | 82 (65.6)               | 30 (53.6)                              |
| ECOG PS, n (%)                            |                         |                                        |                         |                                        |
| 0                                         | 158 (60.5)              | 59(60.8)                               | 77 (61.6)               | 32(57.1)                               |
| 1                                         | 103 (39.5)              | 38(39.2)                               | 48 (38.4)               | 24(42.9)                               |
| KRAS status, n (%)                        |                         |                                        |                         |                                        |
| Mutant                                    | 119 (45.6)              | 49(50.5)                               | 64 (51.2)               | 26(46.4)                               |
| Wild type                                 | 142 (54.4)              | 48(49.5)                               | 61 (48.8)               | 30(53.6)                               |
| Time since diagnosis of metastasis, n (%) |                         |                                        |                         |                                        |
| <18 months                                | 0                       | 0                                      | 0                       | 0                                      |
| ≥18 months                                | 261 (100.0)             | 97(100.0)                              | 125 (100.0)             | 56(100.0)                              |
| Number of prior regimens, n (%)           |                         |                                        |                         |                                        |
| 2                                         | 26 (10.0)               | 7(7.2)                                 | 15 (12.0)               | 6(10.7)                                |
| 3                                         | 50 (19.2)               | 11(11.3)                               | 18 (14.4)               | 6(10.7)                                |
| ≥4                                        | 185 (70.9)              | 79(81.4)                               | 92 (73.6)               | 44(78.6)                               |
| Number of metastatic sites, n (%)         |                         |                                        |                         |                                        |
| 1–2                                       | 261 (100.0)             | 97(100.0)                              | 125 (100.0)             | 56(100.0)                              |
| ≥3                                        | 0                       | 0                                      | 0                       | 0                                      |
| Site of Lesion                            |                         |                                        |                         |                                        |
| Liver                                     | 164(62.8)               | 0                                      | 69(55.2)                | 0                                      |
| Lung                                      | 172(65.9)               | 74(76.3)                               | 100(80.0)               | 47(83.9)                               |
| Lymph                                     | 53(20.3)                | 37(38.1)                               | 32(25.6)                | 24(42.9)                               |

|                                |            |          |           |          |
|--------------------------------|------------|----------|-----------|----------|
| Peritoneum                     | 19(7.3)    | 14(14.4) | 6(4.8)    | 6(10.7)  |
| Primary site of disease, n (%) |            |          |           |          |
| Colon                          | 171 (65.5) | 57(58.8) | 63 (50.4) | 25(44.6) |
| Rectum                         | 90 (34.5)  | 40(41.2) | 62 (49.6) | 31(55.4) |

ECOG PS, Eastern Cooperative Oncology Group performance status; GPC, good prognostic characteristics

**Table S5** Adverse events occurring in ≥10% of patients in any group

| AEs, n (%)                                          | FTD/TPI              |            |                      |            | Placebo              |           |                      |           |
|-----------------------------------------------------|----------------------|------------|----------------------|------------|----------------------|-----------|----------------------|-----------|
|                                                     | GPC subgroup (n=261) |            | PPC subgroup (n=272) |            | GPC subgroup (n=125) |           | PPC subgroup (n=140) |           |
|                                                     | Any grade            | Grade ≥3   | Any grade            | Grade ≥3   | Any grade            | Grade ≥3  | Any grade            | Grade ≥3  |
| Any AE                                              | 257 (98.5)           | 171 (65.5) | 267 (98.2)           | 199 (73.2) | 115 (92.0)           | 57 (45.6) | 132 (94.3)           | 80 (57.1) |
| <b>Blood disorders or laboratory investigations</b> |                      |            |                      |            |                      |           |                      |           |
| Anaemia                                             | 109 (41.8)           | 46 (17.6)  | 105 (38.6)           | 40 (14.7)  | 9 (7.2)              | 2 (1.6)   | 13 (9.3)             | 5 (3.6)   |
| Neutrophil count decrease                           | 87 (33.3)            | 56 (21.5)  | 61 (22.4)            | 29 (10.7)  | 1 (0.8)              | 0         | 0                    | 0         |
| Neutropenia                                         | 85 (32.6)            | 62 (23.8)  | 71 (26.1)            | 45 (16.5)  | 0                    | 0         | 0                    | 0         |
| WBC decrease                                        | 82 (31.4)            | 32 (12.3)  | 64 (23.5)            | 23 (8.5)   | 1 (0.8)              | 0         | 0                    | 0         |
| Platelet count decrease                             | 47 (18.0)            | 7 (2.7)    | 34 (12.5)            | 6 (2.2)    | 2 (1.6)              | 0         | 4 (2.9)              | 0         |
| Blood ALP increase                                  | 22 (8.4)             | 4 (1.5)    | 25 (9.2)             | 14 (5.1)   | 9 (7.2)              | 5 (4.0)   | 17 (12.1)            | 8 (5.7)   |
| Weight loss                                         | 20 (7.7)             | 0          | 21 (7.7)             | 1 (0.4)    | 9 (7.2)              | 0         | 18 (12.9)            | 0         |
| <b>Gastrointestinal disorders</b>                   |                      |            |                      |            |                      |           |                      |           |
| Nausea                                              | 130 (49.8)           | 4 (1.5)    | 128 (47.1)           | 6 (2.2)    | 29 (23.2)            | 1 (0.8)   | 34 (24.3)            | 2 (1.4)   |
| Diarrhoea                                           | 86 (33.0)            | 7 (2.7)    | 84 (30.9)            | 9 (3.3)    | 13 (10.4)            | 0         | 20 (14.3)            | 1 (0.7)   |
| Vomiting                                            | 73 (28.0)            | 6 (2.3)    | 75 (27.6)            | 5 (1.8)    | 14 (11.2)            | 1 (0.8)   | 24 (17.1)            | 0         |
| Constipation                                        | 39 (14.9)            | 1 (0.4)    | 42 (15.4)            | 0          | 18 (14.4)            | 1 (0.8)   | 22 (15.7)            | 2 (1.4)   |
| Abdominal pain                                      | 36 (13.8)            | 1 (0.4)    | 43 (15.8)            | 10 (3.7)   | 10 (8.0)             | 3 (2.4)   | 26 (18.6)            | 7 (5.0)   |

| AEs, n (%)                                    | FTD/TPI              |          |                      |          | Placebo              |          |                      |          |
|-----------------------------------------------|----------------------|----------|----------------------|----------|----------------------|----------|----------------------|----------|
|                                               | GPC subgroup (n=261) |          | PPC subgroup (n=272) |          | GPC subgroup (n=125) |          | PPC subgroup (n=140) |          |
|                                               | Any grade            | Grade ≥3 |
| <b>Metabolism and nutrition disorders</b>     |                      |          |                      |          |                      |          |                      |          |
| Decreased appetite                            | 91 (34.9)            | 9 (3.4)  | 117 (43.0)           | 10 (3.7) | 28 (22.4)            | 6 (4.8)  | 50 (35.7)            | 7 (5.0)  |
| <b>General disorders</b>                      |                      |          |                      |          |                      |          |                      |          |
| Fatigue                                       | 90 (34.5)            | 9 (3.4)  | 98 (36.0)            | 12 (4.4) | 22 (17.6)            | 3 (2.4)  | 40 (28.6)            | 12 (8.6) |
| Asthenia                                      | 50 (19.2)            | 9 (3.4)  | 47 (17.3)            | 9 (3.3)  | 17 (13.6)            | 4 (3.2)  | 13 (9.3)             | 4 (2.9)  |
| Pyrexia                                       | 42 (16.1)            | 1 (0.4)  | 56 (20.6)            | 5 (1.8)  | 11 (8.8)             | 0        | 26 (18.6)            | 1 (0.7)  |
| Peripheral oedema                             | 26 (10.0)            | 0        | 27 (9.9)             | 1 (0.4)  | 8 (6.4)              | 0        | 19 (13.6)            | 2 (1.4)  |
| <b>Respiratory or thoracic disorders</b>      |                      |          |                      |          |                      |          |                      |          |
| Cough                                         | 32 (12.3)            | 2 (0.8)  | 25 (9.2)             | 0        | 18 (14.4)            | 0        | 12 (8.6)             | 2 (1.4)  |
| Dyspnoea                                      | 25 (9.6)             | 5 (1.9)  | 31 (11.4)            | 9 (3.3)  | 17 (13.6)            | 4 (3.2)  | 17 (12.1)            | 6 (4.3)  |
| <b>Skin and subcutaneous tissue disorders</b> |                      |          |                      |          |                      |          |                      |          |
| Alopecia                                      | 27 (10.3)            | 0        | 9 (3.3)              | 0        | 0                    | 0        | 3 (2.1)              | 0        |

AE, adverse event; ALP, alkaline phosphatase; FTD/TPI, trifluridine/tipiracil; GPC, good prognostic characteristics; PPC, poor prognostic characteristics; WBC, white blood cell.

GPC was defined as <3 metastatic sites and ≥18 months since first metastasis.

**Figure S1** Overall survival in RECURSE patients in the GPC subgroup (number of metastatic sites <3 and time since first metastasis  $\geq$ 18 months) with no liver metastasis at randomisation (n=153) receiving trifluridine/tipiracil (blue) or placebo (red).

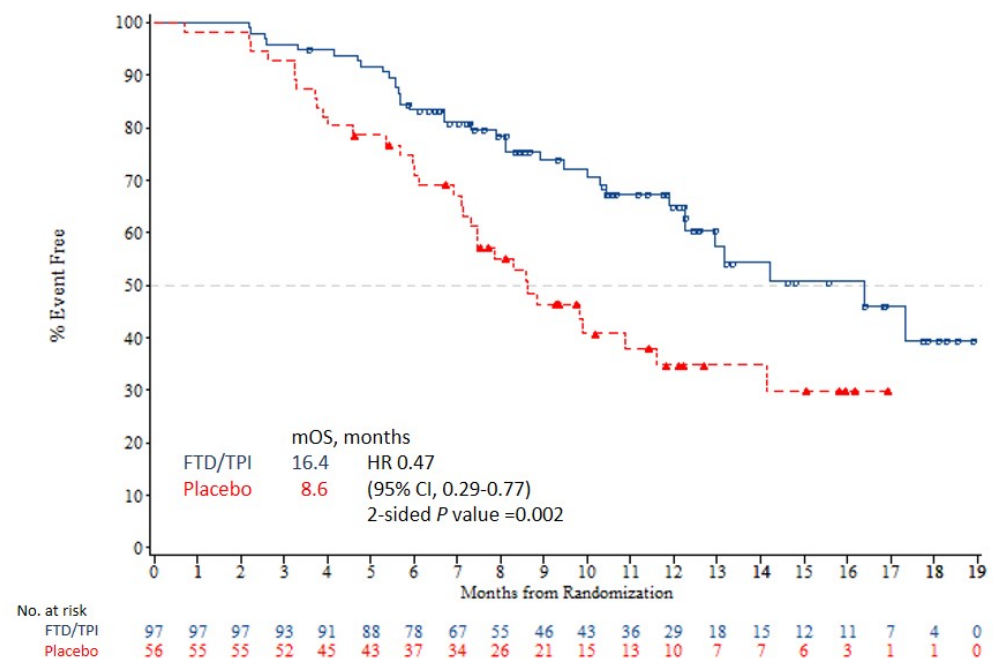



**Figure S2** Progression-free survival in RECOURSE patients in the GPC subgroup (number of metastatic sites <3 and time since first metastasis ≥18 months) with no liver metastasis at randomisation (n=153) receiving trifluridine/tipiracil (blue) or placebo (red).

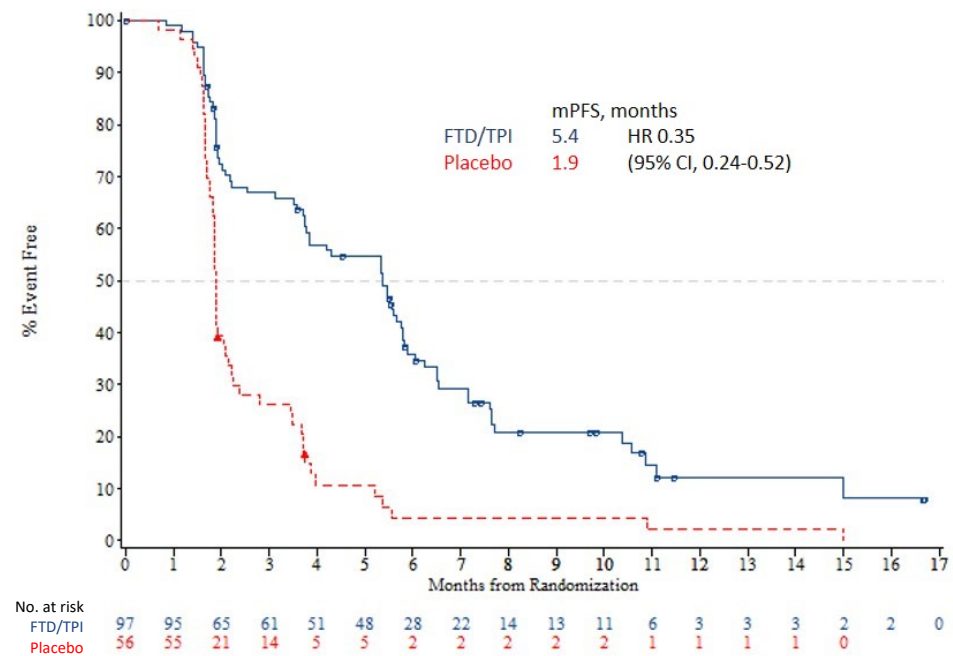

**Figure S3** Time to Eastern Cooperative Oncology Group Performance Status  $\geq 2$  in RECURSE patients in the GPC subgroup (number of metastatic sites  $< 3$  and time since first metastasis  $\geq 18$  months) with no liver metastasis at randomisation (n=153) receiving trifluridine/tipiracil (blue) or placebo (red).

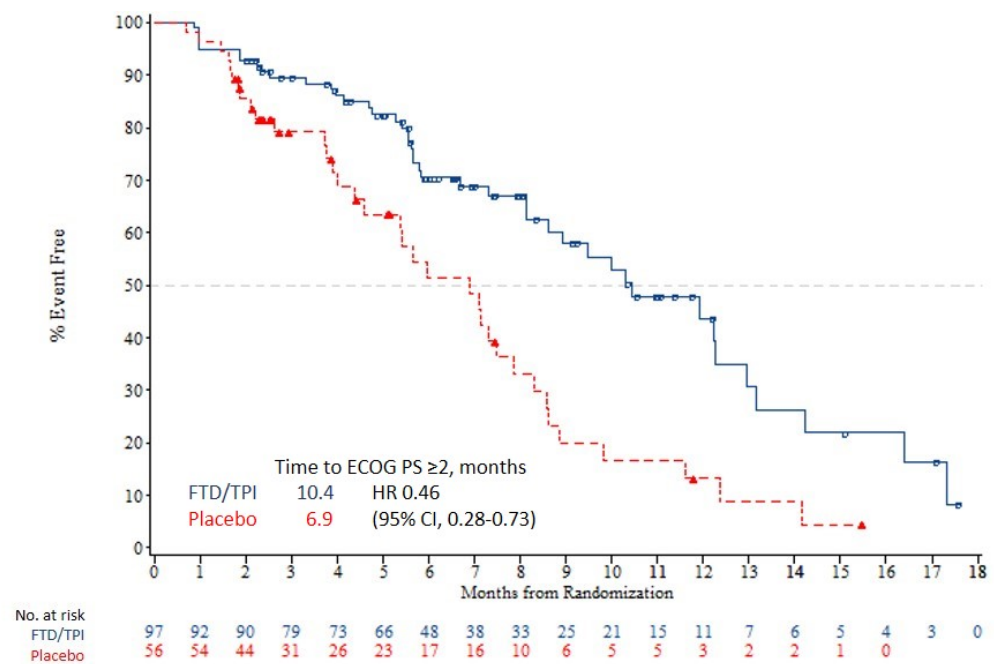

Supplement: esmoopen-2020-000752supp001.pdf [file esmoopen-2020-000752supp001.pdf]
